# Supplementary material
Source: publisher figshare collection journal article supplement (https://acs.figshare.com/ndownloader/files/3619281)
Supplement: Supplementary file 1 [file 3619281]

## Supporting Information (SI)

# Probing a Non-Thermal Plasma Activated Heterogeneously Catalysed Reaction Using *in Situ* DRIFTS-MS

C.E. Stere<sup>1</sup>, W. Adress<sup>2</sup>, R. Burch<sup>1</sup>, S. Chansai<sup>1</sup>, A. Goguet<sup>1</sup>, W. G. Graham<sup>\*2</sup> and  
C. Hardacre<sup>\*1</sup>

<sup>1</sup>*Centre for the Theory and Application of Catalysis, CenTACat, School of Chemistry and  
Chemical Engineering, Queen's University Belfast, Belfast, N. Ireland, U.K.*

<sup>2</sup>*Centre for Plasma Physics, School of Mathematics and Physics, Queen's University  
Belfast, N. Ireland, U.K*

Corresponding author: (\*)[c.hardacre@qub.ac.uk](mailto:c.hardacre@qub.ac.uk), [b.graham@qub.ac.uk](mailto:b.graham@qub.ac.uk)

Figure S1 shows typical current-voltage sinusoidal waveforms when the discharge was present. There is a clear phase difference of about 90° between the current and voltage, the same as when the discharge was turned off.

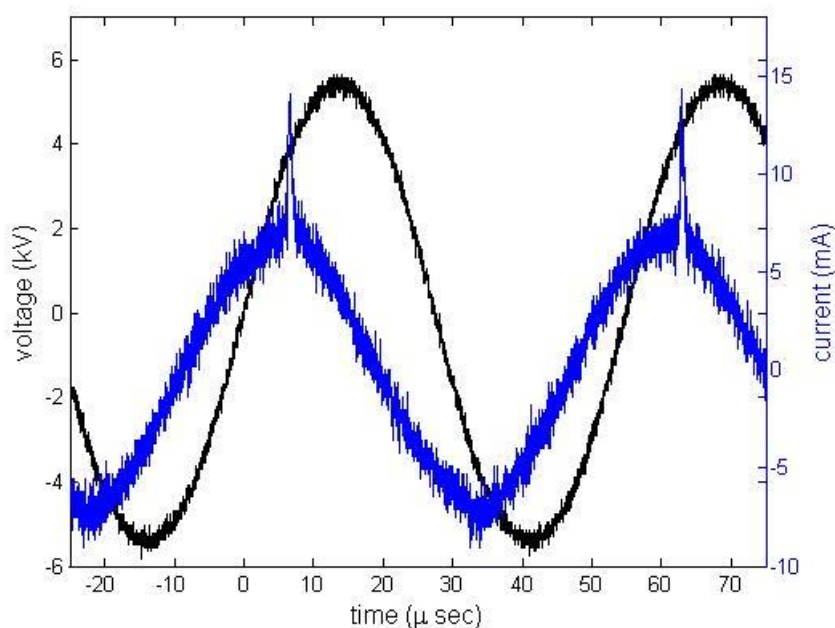

**Figure S1:** Typical one cycle current and voltage sinusoidal waveforms at 6 kV applied voltage, 18.5 kHz and a 2000 cm<sup>3</sup> min<sup>-1</sup> gas flow.

The instantaneous input power  $P_{in}$  and the power dissipated during the discharge process  $P_{dis}$  are given by the following expressions [1]:

$$P_{in} = V_a(t) I_{DBD}(t) \quad (1)$$

$$P_{dis} = V_{gap}(t) I_{gap}(t) \quad (2)$$

The mean value of the input power and the consumed power are defined by the following integration over one wave cycle:

$$\langle P_{in} \rangle = \frac{1}{T} \int_0^T P_{in}(t) dt \quad (3)$$

$$\langle P_{dis} \rangle = \frac{1}{T} \int_0^T P_{dis}(t) dt \quad (4)$$

The mean value of the input power and the consumed power in the DBD plasma, under typical operational conditions (6kV, 20 kHz and 2000 cm<sup>3</sup> min<sup>-1</sup> gas flow rate), were found to be 12 W, and 5W, respectively (with an actual plasma current between 5-5.5 mA).

Figure S2 shows the experimental data of the nitrogen emission line (377-381 nm) for the toluene-SCR reaction, which corresponds to a rotational gas temperature of 91°C at 6kV and 102°C at 7 kV applied voltage.

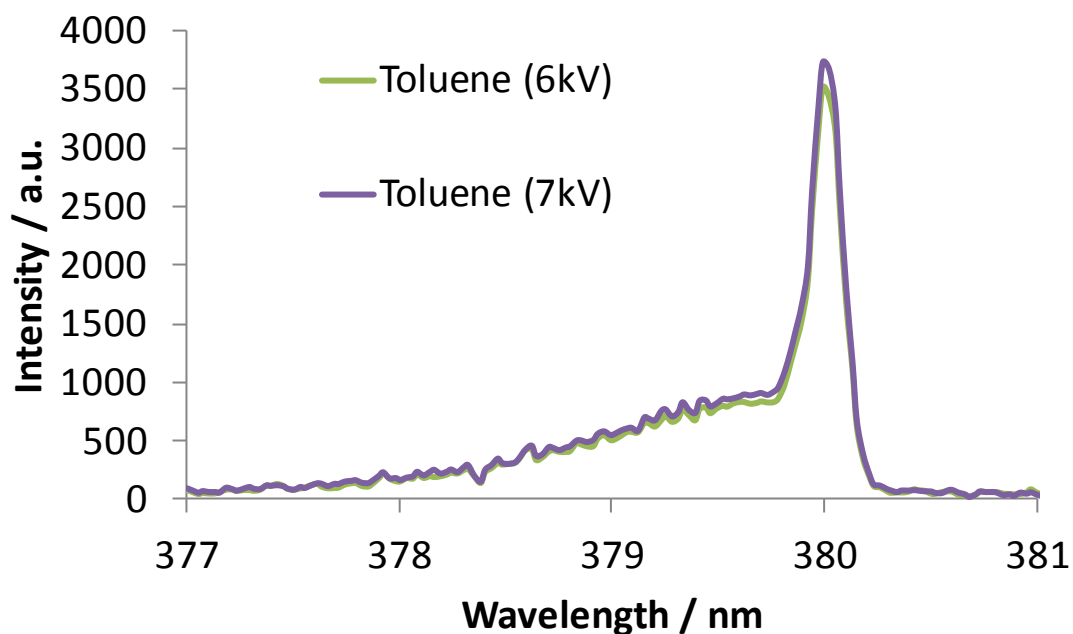

**Figure S2:** Experimental emission spectra of the second positive system of nitrogen for the toluene-SCR reaction at 6 and 7 kV applied voltage.

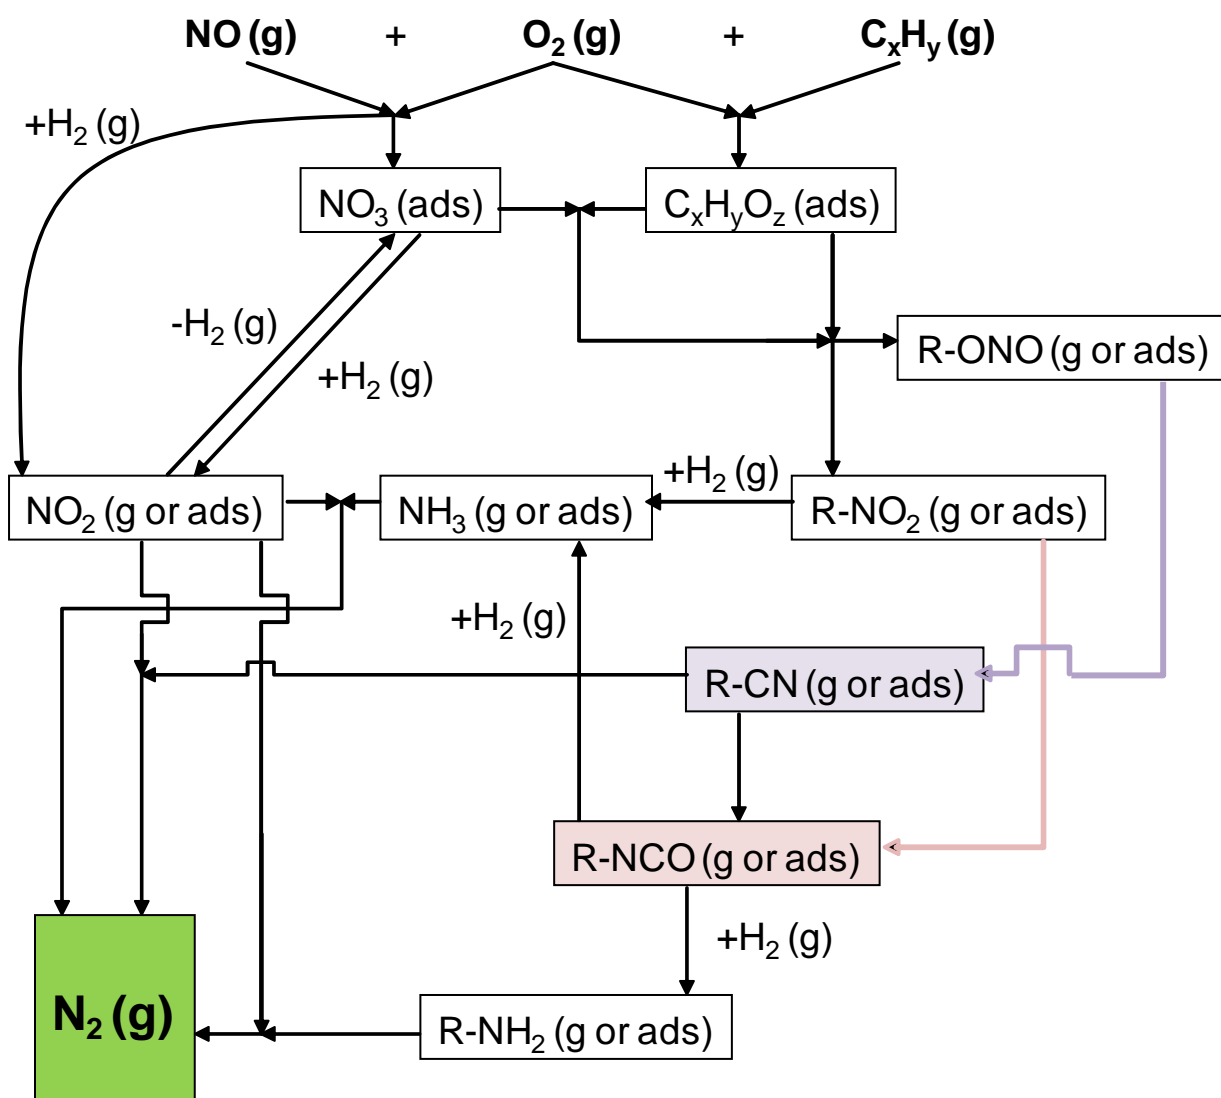

**Figure S3:** Reaction pathways for HC-SCR deNO<sub>x</sub> reaction over a silver-based catalyst (adapted from ref [2,3,4]).

## References

- [1] Liu, S.; Neiger, M. *J. Phys. D: Appl. Phys.* **2003**, 36, 3144-3150.
- [2] Shibata, J.; Shimizu, K.; Satokawa, S.; Satsuma, A.; Hattori, T. *Phys. Chem. Chem. Phys.* **2003**, 5, 2154-2160.
- [3] Breen, J.P.; Burch, R.; Hardacre, C.; Hill, C.J.; Rioche, C. *J. Catal.* **2007**, 246, 1-9.
- [4] Eränen, K.; Klingstedt, F.; Arve, K.; Lindfors, L.E.; Murzin, D.Y. *J. Catal.* **2004**, 227, 328-343.
